# Supplementary material for: Microbial Species Isolated from Infected Wounds and Antimicrobial Resistance Analysis: Data Emerging from a Three-Years Retrospective Study
Source: MDPI journal article supplement (doi:10.3390/antibiotics10101162), 2021-09-24
Supplement: s1 [file s1]

## Supplementary Materials

### Microbial species isolated from infected wounds and antimicrobial resistance analysis: Data emerging from a three-years retrospective study

Valentina Puca<sup>1,2§</sup>, Roberta Zita Marulli<sup>3§</sup>, Rossella Grande<sup>1,2\*</sup>, Irene Vitale<sup>1</sup>, Antonietta Niro<sup>3</sup>, Gina Molinaro<sup>3</sup>, Silvia Prezioso<sup>1</sup>, Raffaella Muraro<sup>4</sup> and Pamela di Giovanni<sup>1</sup>

<sup>1</sup> Department of Pharmacy, "G. d'Annunzio" University of Chieti-Pescara, 66100 Chieti, Italy; valenti-na.puca@unich.it (V.P.); rossella.grande@unich.it (R.G.); irene.vitale@unich.it (I.V.); silvia.prezioso@studenti.unich.it (S.P.), pamela.digiovanni@unich.it (P.D.G.).

<sup>2</sup> Center for Advanced Studies and Technology (CAST), "G. d'Annunzio" University of Chieti-Pescara, 66100 Chieti, Italy; valentina.puca@unich.it (V.P.); rossella.grande@unich.it (R.G.)

<sup>3</sup> Operative Unit of Clinical Pathology, S. Pio Hospital, Vasto (CH), Italy; robymaru@gmail.com (R.Z.M.); anto-nietta.niro@virgilio.it (A.N.); ginamolinaro87@gmail.com (G.N)

<sup>4</sup> Department of Innovative Technologies in Medicine and Dentistry, "G. d'Annunzio" University of Chieti-Pescara, 66100 Chieti, Italy; raffaella.muraro@unich.it (R.M.)

§ VP and RZM contributed equally to the work.

\* Correspondence: Rossella Grande, Department of Pharmacy, "G. d'Annunzio" University of Chieti-Pescara, 66100 Chieti, Italy; rossella.grande@unich.it

**Table S1. Drug resistance patterns of Gram-negative bacteria**

[illegible]

**Table S2. Drug resistance patterns of Gram-positive bacteria**

| Antimicrobials                    | Value, N (%)                        |                                        |                                         |                                             |                                             |                                              |                                             |                                                                    |                                       |                                          |                                           |                                         |                                          |
|-----------------------------------|-------------------------------------|----------------------------------------|-----------------------------------------|---------------------------------------------|---------------------------------------------|----------------------------------------------|---------------------------------------------|--------------------------------------------------------------------|---------------------------------------|------------------------------------------|-------------------------------------------|-----------------------------------------|------------------------------------------|
|                                   | <i>Enterococcus avium</i><br>(n= 1) | <i>Enterococcus faecalis</i><br>(n= 3) | <i>Staphylococcus aureus</i><br>(n= 90) | <i>Staphylococcus auricularis</i><br>(n= 2) | <i>Staphylococcus epidermidis</i><br>(n= 3) | <i>Staphylococcus haemolyticus</i><br>(n= 5) | <i>Staphylococcus lugdunensis</i><br>(n= 2) | <i>Staphylococcus schleiferi</i> ss,<br><i>coagulans</i><br>(n= 1) | <i>Staphylococcus sciuri</i><br>(n=1) | <i>Staphylococcus simulans</i><br>(n= 2) | <i>Streptococcus agalactiae</i><br>(n= 1) | <i>Streptococcus pyogenes</i><br>(n= 1) | <i>Streptococcus salivaris</i><br>(n= 1) |
| Trimethoprim/<br>sulfamethoxazole | -                                   | -                                      | 8 (8.9)                                 | -                                           | 0 (0.0)                                     | 2 (40.0)                                     | 0 (0.0)                                     | 0 (0.0)                                                            | 0 (0.0)                               | 0 (0.0)                                  | 0 (0.0)                                   | 0 (0.0)                                 | -                                        |
| Penicillin                        | -                                   | -                                      | 59 (65.6)                               | 1 (50.0)                                    | 3 (100.0)                                   | -                                            | 1 (50.0)                                    | 0 (0.0)                                                            | -                                     | 2 (100.0)                                | 0 (0.0)                                   | 0 (0.0)                                 | 0 (0.0)                                  |
| Vancomycin                        | 0 (0.0)                             | 0 (0.0)                                | 0 (0.0)                                 | -                                           | 0 (0.0)                                     | 0 (0.0)                                      | 0 (0.0)                                     | -                                                                  | -                                     | 0 (0.0)                                  | 0 (0.0)                                   | 0 (0.0)                                 | 0 (0.0)                                  |
| Teicoplanin                       | 0 (0.0)                             | 0 (0.0)                                | 0 (0.0)                                 | -                                           | 0 (0.0)                                     | -                                            | 0 (0.0)                                     | -                                                                  | 1 (100.0)                             | 0 (0.0)                                  | -                                         | -                                       | -                                        |
| Oxacillin                         | -                                   | -                                      | 19 (21.1)                               | 1 (50.0)                                    | 2 (66.7)                                    | 2 (40.0)                                     | 0 (0.0)                                     | 0 (0.0)                                                            | 1 (100.0)                             | 1 (50.0)                                 | -                                         | -                                       | -                                        |
| Meropenem                         | -                                   | -                                      | -                                       | -                                           | -                                           | -                                            | -                                           | -                                                                  | -                                     | -                                        | -                                         | -                                       | 0 (0.0)                                  |
| Levofloxacin                      | -                                   | -                                      | -                                       | -                                           | -                                           | 1 ((20.0)                                    | -                                           | -                                                                  | -                                     | -                                        | -                                         | -                                       | 1 (100.0)                                |
| Linezolid                         | 0 (0.0)                             | 0 (0.0)                                | 1 (1.1)                                 | 0 (0.0)                                     | 0 (0.0)                                     | 0 (0.0)                                      | 0 (0.0)                                     | -                                                                  | -                                     | 0 (0.0)                                  | -                                         | -                                       | -                                        |
| Gentamicin                        | -                                   | -                                      | 25 (27.8)                               | 0 (0.0)                                     | 2 (66.7)                                    | 3 (60.0)                                     | 1 (50.0)                                    | 0 (0.0)                                                            | 1 (100.0)                             | 1 (50.0)                                 | -                                         | -                                       | -                                        |
| Ampicillin                        | 0 (0.0)                             | 0 (0.0)                                | 64 (71.1)                               | 1 (50.0)                                    | 3 (100.0)                                   | 2 (40.0)                                     | 0 (0.0)                                     | -                                                                  | -                                     | 2 (100.0)                                | -                                         | 0 (0.0)                                 | 0 (0.0)                                  |
| Rifampicin                        | -                                   | -                                      | 6 (6.7)                                 | 1 (50.0)                                    | 1 (33.3)                                    | 0 (0.0)                                      | -                                           | -                                                                  | -                                     | -                                        | -                                         | -                                       | -                                        |
| Daptomycin                        | -                                   | 0 (0.0)                                | 1 (1.1)                                 | 0 (0.0)                                     | 0 (0.0)                                     | 0 (0.0)                                      | 0 (0.0)                                     | -                                                                  | 1 (100.0)                             | -                                        | -                                         | -                                       | -                                        |
| Cefotaxime                        | -                                   | -                                      | -                                       | -                                           | -                                           | -                                            | -                                           | -                                                                  | -                                     | -                                        | -                                         | 0 (0.0)                                 | 0 (0.0)                                  |
| Amoxicillin/clav<br>ulanic acid   | 0 (0.0)                             | 0 (0.0)                                | 10 (11.1)                               | 1 (50.0)                                    | 2 (66.7)                                    | 2 (40.0)                                     | -                                           | -                                                                  | -                                     | 0 (0.0)                                  | -                                         | -                                       | -                                        |
| Ciprofloxacin                     | -                                   | -                                      | 13 (14.4)                               | -                                           | -                                           | 0 (0.0)                                      | -                                           | -                                                                  | -                                     | 0 (0.0)                                  | -                                         | -                                       | -                                        |
| Netilmicin                        | -                                   | 1                                      | 0 (0.0)                                 | 0 (0.0)                                     | 0 (0.0)                                     | 0 (0.0)                                      | 0 (0.0)                                     | -                                                                  | -                                     | 0 (0.0)                                  | -                                         | -                                       | -                                        |
| Erythromycin                      | -                                   | -                                      | 21 (23.3)                               | 1 (50.0)                                    | 3 (100.0)                                   | 4 ((80.0)                                    | 1 (50.0)                                    | 0 (0.0)                                                            | 1 (100.0)                             | 0 (0.0)                                  | 0 (0.0)                                   | 0 (0.0)                                 | 0 (0.0)                                  |
| Clindamycin                       | -                                   | -                                      | 14 (15.6)                               | -                                           | -                                           | 1 (20.0)                                     | -                                           | 0 (0.0)                                                            | -                                     | 0 (0.0)                                  | 0 (0.0)                                   | -                                       | 0 (0.0)                                  |
| Cefepime                          | -                                   | -                                      | -                                       | -                                           | -                                           | -                                            | -                                           | -                                                                  | -                                     | -                                        | -                                         | 0 (0.0)                                 | -                                        |
| Cefuroxime                        | -                                   | -                                      | -                                       | -                                           | -                                           | -                                            | -                                           | -                                                                  | -                                     | -                                        | -                                         | 0 (0.0)                                 | 1 (100.0)                                |
| Ceftriaxone                       | -                                   | -                                      | -                                       | -                                           | -                                           | -                                            | -                                           | -                                                                  | -                                     | -                                        | -                                         | 0 (0.0)                                 | 0 (0.0)                                  |
| Cefaclor                          | -                                   | -                                      | -                                       | -                                           | -                                           | -                                            | -                                           | -                                                                  | -                                     | -                                        | -                                         | 0 (0.0)                                 | 1 (100.0)                                |
| Azithromycin                      | -                                   | -                                      | -                                       | -                                           | -                                           | -                                            | -                                           | -                                                                  | -                                     | -                                        | -                                         | 0 (0.0)                                 | 0 (0.0)                                  |
| Fosfomycin                        | -                                   | -                                      | -                                       | -                                           | 0 (0.0)                                     | 0 (0.0)                                      | -                                           | -                                                                  | -                                     | -                                        | -                                         | -                                       | -                                        |
| Clarithromycin                    | -                                   | -                                      | -                                       | -                                           | 2 (66.7)                                    | -                                            | -                                           | -                                                                  | -                                     | -                                        | -                                         | -                                       | -                                        |
